# Supplementary material
Source: publisher figshare collection journal article supplement (https://sage.figshare.com/ndownloader/files/24789564)

24/9/2018

To Whom It May Concern

I give permission to Caro Thake to use the attached images as illustrations in her research article in HERD: Health Environments Research and Design Journal.

Narelle Renn

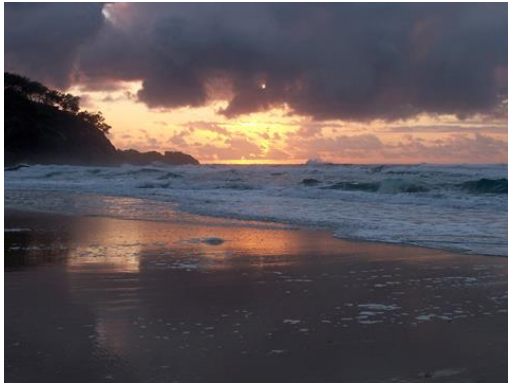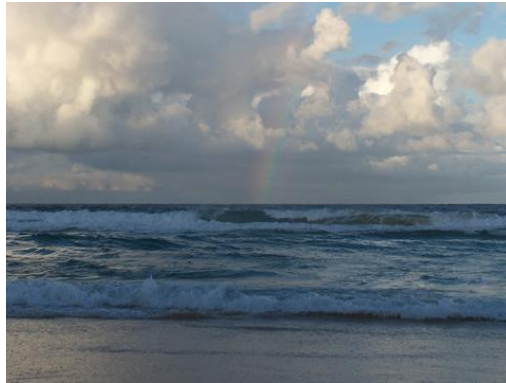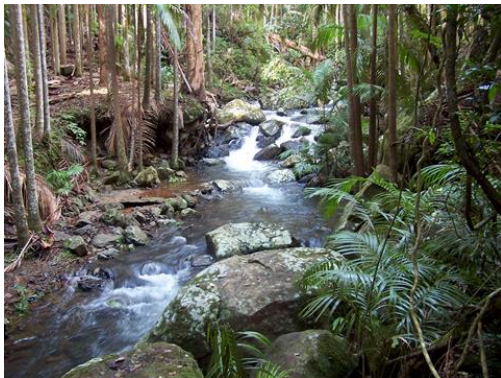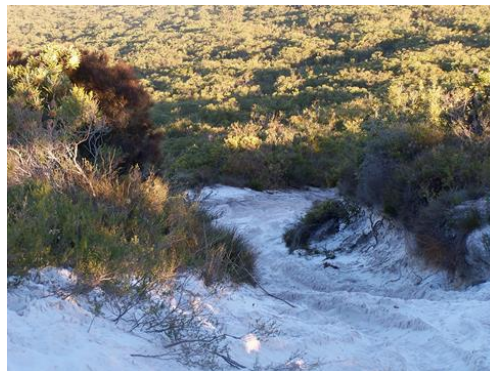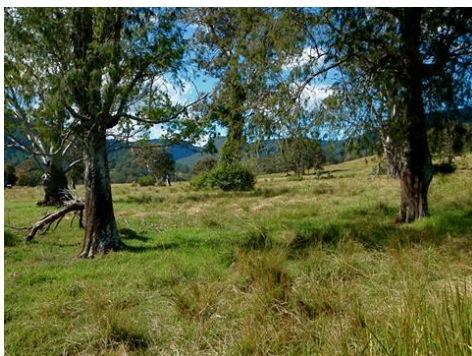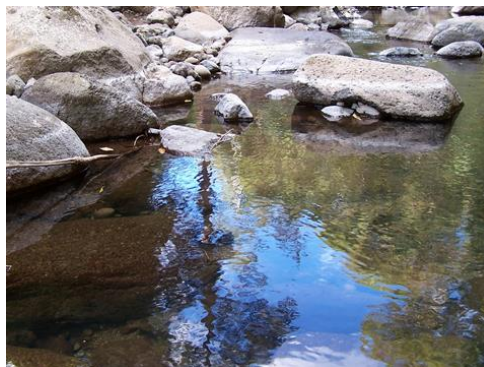

Supplement: Supplementary file 1 [file 24789564]
